# Supplementary material
Source: PubMed Central journal article supplement (PMC4925284)
Supplement: NIHMS781269-supplement-2.pdf [file NIHMS781269-supplement-2.pdf]

## Supplementary Note

### A method to decipher pleiotropy by detecting underlying heterogeneity driven by hidden subgroups applied to autoimmune and neuropsychiatric diseases

Buhm Han<sup>1-4,25</sup>, Jennie G Pouget<sup>1,5-7,25</sup>, Kamil Slowikowski<sup>1,3,4,8</sup>, Eli Stahl<sup>9</sup>, Cue Hyunky Lee<sup>10</sup>, Dorothee Diogo<sup>1-3</sup>, Xinli Hu<sup>1,3,4,11</sup>, Yu Rang Park<sup>10,12</sup>, Eunji Kim<sup>10,13</sup>, Peter K Gregersen<sup>14</sup>, Solbritt Rantapää Dahlqvist<sup>15</sup>, Jane Worthington<sup>16,17</sup>, Javier Martin<sup>18</sup>, Steve Eyre<sup>16,17</sup>, Lars Klareskog<sup>19</sup>, Tom Huizinga<sup>20</sup>, Wei-Min Chen<sup>21</sup>, Suna Onengut-Gumuscu<sup>21</sup>, Stephen S Rich<sup>21</sup>, Major Depressive Disorder Working Group of the Psychiatric Genomics Consortium<sup>22</sup>, Naomi R Wray<sup>23</sup>, Soumya Raychaudhuri<sup>1,3,4,19,24</sup>

<sup>1</sup>Department of Medicine, Brigham and Women's Hospital and Harvard Medical School, Boston, USA

<sup>2</sup>Department of Convergence Medicine, University of Ulsan College of Medicine & Asan Institute for Life Sciences, Asan Medical Center, Seoul, Republic of Korea

<sup>3</sup>Partners Center for Personalized Genetic Medicine, Boston, USA

<sup>4</sup>Program in Medical and Population Genetics, Broad Institute of MIT and Harvard, Cambridge, USA

<sup>5</sup>Campbell Family Mental Health Research Institute, Centre for Addiction and Mental Health, Toronto, Canada

<sup>6</sup>Institute of Medical Sciences, University of Toronto, Toronto, Canada

<sup>7</sup>Department of Psychiatry, University of Toronto, Toronto, Canada

<sup>8</sup>Bioinformatics and Integrative Genomics, Harvard University, Cambridge, USA

<sup>9</sup>Department of Psychiatry, Mount Sinai School of Medicine, New York, USA

<sup>10</sup>Asan Institute for Life Sciences, University of Ulsan College of Medicine, Asan Medical Center, Seoul, Republic of Korea

<sup>11</sup>Harvard-MIT Division of Health Sciences and Technology, Boston, USA

<sup>12</sup>Department of Biomedical Informatics, Asan Medical Center, Seoul, Republic of Korea

<sup>13</sup>Department of Chemistry, Seoul National University, Seoul, Republic of Korea

<sup>14</sup>Robert S. Boas Center for Genomics and Human Genetics, The Feinstein Institute for Medical Research, Manhasset, USA

<sup>15</sup>Department of Public Health and Clinical Medicine, Rheumatology, Umeå University, Umeå, Sweden

<sup>16</sup>Arthritis Research UK Centre for Genetics and Genomics, Musculoskeletal Research Centre, Institute for Inflammation and Repair, Manchester Academic Health Science Centre, University of Manchester, Manchester, UK

<sup>17</sup>National Institute for Health Research, Manchester Musculoskeletal Biomedical Research Unit, Central Manchester University Hospitals National Health Service Foundation Trust, Manchester Academic Health Sciences Centre, Manchester, UK

<sup>18</sup>Instituto de Parasitología y Biomedicina López-Neyra, Consejo Superior de Investigaciones Científicas, Granada, Spain

<sup>19</sup>Rheumatology Unit, Department of Medicine, Karolinska Institutet and Karolinska University Hospital Solna, Stockholm, Sweden

<sup>20</sup>Department of Rheumatology, Leiden University Medical Centre, Leiden, the Netherlands

<sup>21</sup>Center for Public Health Genomics, University of Virginia, Charlottesville, USA

<sup>22</sup>A full list of members and affiliations appears in the **Supplementary Note**

<sup>23</sup>The University of Queensland, Queensland Brain Institute, Brisbane, Australia

<sup>24</sup>Institute of Inflammation and Repair, University of Manchester, Manchester, UK

<sup>25</sup>These authors contributed equally to this work

Correspondence to:

**Soumya Raychaudhuri**

77 Avenue Louis Pasteur, Harvard New Research Building, Suite 250D, Boston, MA 02446, USA. [soumya@broadinstitute.org](mailto:soumya@broadinstitute.org); 617-525-4484 (tel); 617-525-4488 (fax)

**Buhm Han**

Asan Institute for Life Sciences, Asan Medical Center, 88, Olympic-ro 43-gil, Songpa-gu, Seoul 138-736, Korea. [buhm.han@amc.seoul.kr](mailto:buhm.han@amc.seoul.kr); 82-2-3010-2648 (tel); 82-2-3010-2619 (fax)

**TABLE OF CONTENTS**

| <b>Supplementary Note</b>                                                                            |                                                                               | <b>Page</b> |
|------------------------------------------------------------------------------------------------------|-------------------------------------------------------------------------------|-------------|
| Motivating intuition for BUHMBOX                                                                     |                                                                               | 3           |
| Derivation of BUHMBOX                                                                                |                                                                               | 7           |
| Optimization of BUHMBOX                                                                              |                                                                               | 9           |
| Polygenic modeling and BUHMBOX                                                                       |                                                                               | 12          |
| Interpretation of BUHMBOX results                                                                    |                                                                               | 14          |
| Meta-analysis with scale differences                                                                 |                                                                               | 16          |
| References for Supplementary Note                                                                    |                                                                               | 22          |
| <b>Supplementary Tables</b>                                                                          |                                                                               |             |
| Supplementary Table 1                                                                                | Null and alternative hypotheses of GRS and BUHMBOX                            | 23          |
| Supplementary Table 2                                                                                | False positive rate of BUHMBOX                                                | 24          |
| Supplementary Table 3                                                                                | Detailed SNP information used for GRS and BUHMBOX                             | 25          |
| Supplementary Table 4                                                                                | GRS and BUHMBOX results                                                       | 25          |
| Supplementary Table 5                                                                                | MDD sample description                                                        | 26          |
| Supplementary Table 6                                                                                | Summary of selected previous estimates of genetic overlap between MDD and SCZ | 27          |
| <b>Members of the Major Depressive Disorder Working Group of the Psychiatric Genomics Consortium</b> |                                                                               | 28          |

## MOTIVATING INTUITION FOR BUHMBOX

### *Allele dosages are uncorrelated if there is no subgroup heterogeneity*

Our method is built upon the intuition that if there is no subgroup heterogeneity in case individuals, then for loci that are independent in control individuals, under the additive model assumption, the risk alleles at those loci will be independent in the case individuals as well. Although this seems to be intuitive, analytically proving this will set up the reasoning for our null hypothesis of no correlations.

We will assume haploid model and consider two loci that are biallelic. If we consider two loci together, there will be 4 possible pairs of alleles. Thus, we can define a new “virtual locus” that consists of the two loci, which has 4 alleles. To deal with 4 alleles, in the following, it will be useful to define the multiallelic odds ratio. For a single biallelic locus, if we let  $p^+$  and  $p^-$  be the risk allele frequencies (RAFTs) in cases and controls respectively, the biallelic odds ratio (OR) is

$$\gamma = \frac{p^+/(1-p^+)}{p^-/(1-p^-)}$$

Thus, case RAF is a function of OR and control RAF,

$$p^+ = \frac{\gamma p^-}{(\gamma-1)p^-+1} \quad (1)$$

Then we generalize biallelic OR to multiple alleles. Suppose that we have  $M$  different risk alleles in addition to a reference allele (total  $M+1$  alleles). Let  $p_R^+$  and  $p_R^-$  be the case and control reference allele frequencies. Let  $p_i^+$  and  $p_i^-$  be the case and control RAFTs of allele  $i$  ( $i=1, \dots, M$ ). The constraints are,  $p_1^+ + p_2^+ + \dots + p_M^+ + p_R^+ = 1$  and  $p_1^- + p_2^- + \dots + p_M^- + p_R^- = 1$ . The multiallelic odds ratios are defined as

$$\begin{aligned} \gamma_1 &= \frac{p_1^+/p_R^+}{p_1^-/p_R^-} \\ \dots &\dots \\ \gamma_M &= \frac{p_M^+/p_R^+}{p_M^-/p_R^-} \end{aligned}$$

Again, case RAF is a function of OR and control RAF. For reference allele,

$$p_R^+ = \frac{1}{1 + \frac{1}{p_R} \sum_{i=1}^M p_i^- \gamma_i} \quad (2)$$

and for allele  $i=1, \dots, M$ ,

$$p_i^+ = p_i^- \gamma_i \frac{p_R^+}{p_R^-} \quad (3)$$

Now recall that we consider two independent biallelic risk loci. Let  $\gamma_1$  and  $\gamma_2$  be their respective ORs and  $p_1^-$  and  $p_2^-$  be their control RAFs. Let  $p_1^+$  and  $p_2^+$  be the case RAFs, which can be derived from equation (1). We assume the standard additive model that, if an individual has risk alleles at both loci, the resulting OR is  $\gamma_1 \times \gamma_2$ . If we consider “virtual locus” spanning the two loci, there will be 4 possible alleles. We can build the following multi-allelic frequency table,

| Alleles at locus 1 and 2  | Case                   | Control                                         | OR                  |
|---------------------------|------------------------|-------------------------------------------------|---------------------|
| Risk at both              | $p_{12}^+$             | $p_{12}^- = p_1^- p_2^-$                        | $\gamma_1 \gamma_2$ |
| Reference at 1, Risk at 2 | $p_{1\bar{2}}^+$       | $p_{1\bar{2}}^- = (1 - p_1^-) p_2^-$            | $\gamma_2$          |
| Risk at 1, Reference at 2 | $p_{\bar{1}2}^+$       | $p_{\bar{1}2}^- = p_1^- (1 - p_2^-)$            | $\gamma_1$          |
| Reference at both         | $p_{\bar{1}\bar{2}}^+$ | $p_{\bar{1}\bar{2}}^- = (1 - p_1^-)(1 - p_2^-)$ | 1                   |

Note that the control allele frequency is simply multiplication of the frequencies at the two loci (“Control” column in the table above), because these loci are uncorrelated in control individuals. Our goal is to prove that the case allele frequency can be similarly decomposed into the multiplication of the frequencies of the two loci. If that is the case, that will show that these loci are independent in the case individuals as well. Consider the reference allele frequency,  $p_{\bar{1}\bar{2}}^+$ . By equation (2), we have



$$\begin{aligned}
 p_{12}^+ &= \frac{1}{1 + \frac{p_{12}^-}{p_{12}^-} \gamma_1 + \frac{p_{12}^-}{p_{12}^-} \gamma_2 + \frac{p_{12}^-}{p_{12}^-} \gamma_1 \gamma_2} \\
 &= \frac{1}{1 + \frac{p_1^-(1-p_2^-)}{(1-p_1^-)(1-p_2^-)} \gamma_1 + \frac{(1-p_1^-)p_2^-}{(1-p_1^-)(1-p_2^-)} \gamma_2 + \frac{p_1^- p_2^-}{(1-p_1^-)(1-p_2^-)} \gamma_1 \gamma_2} \\
 &= \frac{(1-p_1^-)(1-p_2^-)}{(1-p_1^-)(1-p_2^-) + p_1^-(1-p_2^-) \gamma_1 + (1-p_1^-)p_2^- \gamma_2 + p_1^- p_2^- \gamma_1 \gamma_2} \\
 &= \frac{(1-p_1^-)(1-p_2^-)}{((1-p_1^-) + \gamma_1 p_1^-)((1-p_2^-) + \gamma_2 p_2^-)} \\
 &= (1 - p_1^+)(1 - p_2^+)
 \end{aligned} \tag{4}$$

Thus, the case allele frequency is also a multiplication of the frequencies of the two loci.

The similar decomposition can be done for the other three alleles. For example, by equations (3) and (4),

$$\begin{aligned}
 p_{12}^+ &= p_{12}^- \gamma_1 \gamma_2 \frac{p_{12}^+}{p_{12}^-} \\
 &= p_1^- p_2^- \gamma_1 \gamma_2 \frac{(1-p_1^+)(1-p_2^+)}{(1-p_1^-)(1-p_2^-)} \\
 &= \gamma_1 p_1^- \frac{(1-p_1^+)}{(1-p_1^-)} \gamma_2 p_2^- \frac{(1-p_2^+)}{(1-p_2^-)} \\
 &= p_1^+ p_2^+
 \end{aligned}$$

Since the frequency is the product of frequencies of each allele, the two loci are independent. Thus, we conclude that the loci that are independent in controls will also be independent in case individuals under the standard additive model.

### ***Subgroup heterogeneity induces positive correlations***

An equally important intuition is that if there is subgroup heterogeneity, the risk alleles at loci that are independent in control individuals will show positive correlations in case individuals. This fact sets the foundation stone for our alternative hypothesis of positive correlations.

Suppose that disease A ( $D_A$ ) case individuals consist of two groups: one group genetically similar to a second trait (disease B,  $D_B$ ) and the rest not similar to  $D_B$ . Say ( $\pi \times 100$ )% of case individuals are in the  $D_B$ -similar group. We will call  $\pi$  the *heterogeneity proportion*. Consider two independent SNPs that are associated to the second trait. Let their risk allele frequencies be  $p_1^+$  and  $p_2^+$  in the  $D_B$ -similar group and  $p_1^-$  and  $p_2^-$  in the rest. Note that the two loci are uncorrelated within each subgroup (the  $D_B$ -similar group comprises individuals that are genetically cases for  $D_B$ , and we have already shown that independent risk loci will be uncorrelated in case individuals under the standard additive model).

If we consider frequencies of haplotypes spanning the two loci in the  $D_A$  case individuals consisting of both subgroups,

| Alleles at locus 1 and 2  | Haplotype            | Frequency                                                     |
|---------------------------|----------------------|---------------------------------------------------------------|
| Risk at both              | $p_{12}$             | $\pi p_1^+ p_2^+ + (1 - \pi) p_1^- p_2^-$                     |
| Reference at 1, Risk at 2 | $p_{\bar{1}2}$       | $\pi(1 - p_1^+) p_2^+ + (1 - \pi)(1 - p_1^-) p_2^-$           |
| Risk at 1, Reference at 2 | $p_{1\bar{2}}$       | $\pi p_1^+ (1 - p_2^+) + (1 - \pi) p_1^- (1 - p_2^-)$         |
| Reference at both         | $p_{\bar{1}\bar{2}}$ | $\pi(1 - p_1^+)(1 - p_2^+) + (1 - \pi)(1 - p_1^-)(1 - p_2^-)$ |

The expected value of Pearson correlation is therefore

$$r_{12} = \frac{p_{12} p_{\bar{1}\bar{2}} - p_{\bar{1}2} p_{1\bar{2}}}{\sqrt{p_{1\cdot} p_{\bar{1}\cdot} p_{\cdot 2} p_{\cdot \bar{2}}}} \quad (5)$$

where dot ( $\cdot$ ) in the subscript denotes marginal frequency, for example  $p_{1\cdot} = p_{12} + p_{1\bar{2}}$ . A few interesting characteristics are, (1)  $r_{12}$  is always positive or zero because we considered risk allele dosage at both loci. (2)  $r_{12} = 0$  if  $\pi = 0$  or  $\pi = 1$ . (3)  $r_{12} = 0$  if risk is zero ( $p_1^+ = p_1$  and  $p_2^+ = p_2$ ). (4)  $r_{12}$  is a function of RAF, OR, and  $\pi$  (but not of sample size).  $r_{12}$  is typically a very small value. **Supplementary Figure 2** shows the value of  $r_{12}$

as a function of OR at the two loci (when we fix  $p_1$  and  $p_2$  to 0.5) and the value of  $r_{12}$  as a function of  $p_1$  and  $p_2$  (when we fix OR to 1.5 at both loci).

## **DERIVATION OF BUHMBOX**

### ***Null and alternative hypotheses***

Building upon the aforementioned intuitions, we can build the BUHMBOX statistic to detect positive correlations between independent loci, which will be evidence of subgroup heterogeneity. Suppose that we examine  $D_A$  case individuals at  $M$  independent  $D_B$ -associated loci. Between these loci, we calculate correlations of risk allele dosages to obtain an  $M \times M$  correlation matrix,  $\mathbf{R}$ . The null hypothesis of our method is that the non-diagonal elements of  $\mathbf{R}$  are zero. The alternative hypothesis of our method is that the non-diagonal elements of  $\mathbf{R}$  are positive. We build our method in the following steps.

### ***Combining correlations into one statistic***

The first challenge is to combine  $M(M - 1)/2$  non-diagonal elements of  $\mathbf{R}$  into one statistic. To this end, we show that under the null hypothesis of no correlations, the non-diagonal elements of the observed correlation matrix will be independent of each other. We employ the framework of Jennrich<sup>1</sup>. Jennrich describes a framework for testing deviance of a correlation matrix from a specified null matrix. To describe the framework briefly, let  $\mathbf{P} = (\rho_{ij})$  be a specific  $M \times M$  correlation matrix that defines the null hypothesis. The goal is to test if the observed sample correlation matrix  $\mathbf{R}$  deviates from  $\mathbf{P}$ . To define a statistic, what we need is the inverse of asymptotic covariance matrix for

the maximum likelihood estimates of  $\rho_{ij}$ , which we call  $\Gamma^{-1}$ . Note that  $\Gamma^{-1}$  is a  $q \times q$  matrix where  $q = M(M - 1)/2$ .

Let  $\mathbf{P}^{-1} = (\rho^{ij})$ . Let  $\delta_{ij}$  be the Kronecker delta, that is, 1 if  $i = j$  and zero otherwise. We define  $\mathbf{T} = (t_{ij})$  as the following,

$$t_{ij} = \delta_{ij} + \rho_{ij}\rho^{ij} \quad (6)$$

Then,  $\Gamma^{-1}$  is given by

$$\Gamma^{-1}(i, j; k, l) = \rho^{ik}\rho^{jl} + \rho^{il}\rho^{jk} - \rho^{ij}(t^{ik} + t^{jk} + t^{il} + t^{jl})\rho^{kl} \quad (7)$$

Given these, if we define

$$\mathbf{Y} = \sqrt{N}(\mathbf{R} - \mathbf{P}) = (y_{ij}) \quad (8)$$

where  $N$  is the number of samples used to calculate  $R$ , the test statistic is

$$S_{Jennrich} = \sum_{i < j} \sum_{k < l} y_{ij} \Gamma^{-1}(i, j; k, l) y_{kl} \quad (9)$$

which follows  $\chi^2$  distribution with  $q$  degrees of freedom under the null. The computation is challenging if  $p$  is large because of the time complexity  $O(q^2) = O(p^4)$ . Jennrich applies an optimization technique to simplify the formula to

$$S_{Jennrich} = \frac{1}{2} \text{tr}(\mathbf{Y}\mathbf{P}^{-1}\mathbf{Y}\mathbf{P}^{-1}) - dg' (\mathbf{P}^{-1}\mathbf{Y})\mathbf{T}^{-1}dg(\mathbf{P}^{-1}\mathbf{Y}) \quad (10)$$

which only involves operations between  $M \times M$  matrices requiring only  $O(M^3)$ .

In our situation, this statistic simplifies further. Our null hypothesis is no correlation. Thus, the identity matrix  $\mathbf{I}$  is our null correlation matrix ( $\mathbf{P} = \mathbf{I}$ ). Substituting  $\mathbf{P}$  with  $\mathbf{I}$ , the statistic simplifies to

$$S_{Jennrich} |_{\mathbf{P}=\mathbf{I}} = \frac{1}{2} \text{tr}(\mathbf{Y}\mathbf{Y}) = \sum_{i < j} y_{ij}^2 \quad (11)$$

Note that each  $y_{ij}$  asymptotically follows a normal distribution (thus, a z-score). The statistic can be interpreted as the following; under the specific situation  $\mathbf{P} = \mathbf{I}$ , the z-scores become asymptotically independent. Thus, we can combine information by

simply summing up their squares which will follow  $\chi^2$  distribution with  $q$  degrees of freedom.

## OPTIMIZATION OF BUHMBOX

### *Accounting for directions to increase power*

A straightforward application of Jennrich's approach in equation (11) is not optimal for our situation, because Jennrich's test is a general test that does not account for the direction of correlations. As we have described, subgroup heterogeneity only results in positive expected correlations between risk loci. Thus, accounting for this fact may give us better power.

To this end, we employ the meta-analytic framework Wei<sup>2,3</sup> and Lin and Sullivan<sup>4</sup>. This framework combines multiple estimates whose asymptotic covariance is known while accounting for their directions. Applying this approach, we obtain a new statistic that is alternative to equation (9),

$$S_{Directional} = \frac{\sum_{i<j} \sum_{k<l} y_{ij} \Gamma^{-1}(i,j;k,l)}{\sqrt{\sum_{i<j} \sum_{k<l} \Gamma^{-1}(i,j;k,l)}}$$

which follows  $N(0,1)$  under the null hypothesis of  $R = P$ . To reduce computational complexity, we can apply the same optimization technique of Jennrich to simplify the statistic to

$$S_{Directional} = \frac{\frac{1}{2} \text{tr}(\mathbf{Y}\mathbf{P}^{-1}\mathbf{E}\mathbf{P}^{-1}) - dg' (\mathbf{P}^{-1}\mathbf{Y})\mathbf{T}^{-1}dg(\mathbf{P}^{-1}\mathbf{E})}{\sqrt{\frac{1}{2} \text{tr}(\mathbf{E}\mathbf{P}^{-1}\mathbf{E}\mathbf{P}^{-1}) - dg' (\mathbf{P}^{-1}\mathbf{E})\mathbf{T}^{-1}dg(\mathbf{P}^{-1}\mathbf{E})}}$$

where  $\mathbf{E}$  is an  $M \times M$  matrix whose elements are all ones.

In our specific situation that  $\mathbf{P} = \mathbf{I}$ , this statistic further simplifies to

$$S_{Directional} |_{\mathbf{P}=\mathbf{I}} = \frac{\sum_{i<j} y_{ij}}{\sqrt{q}} \tag{12}$$

which follows the standard normal distribution under the null hypothesis. We calculate significance of this statistic using the normal distribution in a positive one-sided test.

***Optimizing weights based on effect sizes and allele frequencies***

The directional test in equation (12) accounts for the directions of correlations, but does not account for the effect size and frequency differences between loci. As we have shown, expected correlation of two loci is a function of not only  $\pi$ , heterogeneity proportion, but also the effect sizes and RAFs of the two loci. Thus, each pair of loci will have different expected correlations. When we combine correlations to one statistic, we can have better power by giving higher weights to the pairs of high expected correlations.

Recall that the expected correlation is, as given in equation (5),

$$r_{12} = \frac{p_{12}p_{1\bar{2}} - p_{\bar{1}2}p_{1\bar{2}}}{\sqrt{p_1 \cdot p_{\bar{1}} \cdot p_2 \cdot p_{\bar{2}}}}$$

We examine what is the increase in  $r_{12}$  given an increase in  $\pi$  at the local region around the null hypothesis  $\pi = 0$ .

$$w_{12} = \frac{\partial r_{12}}{\partial \pi} \Big|_{\pi=0} = \frac{\sqrt{p_1(1-p_1)p_2(1-p_2)}(\gamma_1-1)(\gamma_2-1)}{((\gamma_1-1)p_1+1)((\gamma_2-1)p_2+1)}$$

The value  $w_{12}$  can be thought of as the slope of the curves evaluated at  $\pi = 0$ . For any loci pair  $i$  and  $j$ , we can calculate  $w_{ij}$ .

Then what we need is an optimal strategy to incorporate  $w_{ij}$  into our testing, so that our method can have the local optimum property at around  $\pi = 0$ . That is, should we weight  $y_{ij}$  by  $w_{ij}$  or  $\sqrt{w_{ij}}$ ? We note that our situation is analogous to a situation where in a meta-analysis, the effect sizes are the same for all participating studies but their units or scales are different, thus requiring different weights. We extended the traditional

meta-analysis method, fixed effects model (FE), to a new model which can deal with the situation that the scales are different between studies. We present the details in the end of **Supplementary Note**. Briefly speaking of the conclusion, the optimal strategy is multiplying the scaling parameters directly into the weights of the sum of weighted z-scores.

Based on this reasoning, our statistic becomes

$$S_{BUHMBOX} = \frac{\sum_{i<j} w_{ij} y_{ij}}{\sqrt{\sum_{i<j} w_{ij}^2}} \quad (13)$$

which follows  $N(0,1)$  under the null hypothesis. We calculate the significance of this statistic using the normal distribution assuming a positive one-sided test.

### ***Controlling for LD and utilizing control samples***

Because linkage disequilibrium (LD) can induce unexpected correlations between loci, one should prune the loci before applying BUHMBOX. We suggest a harsh criterion (e.g. removing SNPs that are  $r^2 < 0.1$  or that are nearby (within  $\pm 1\text{Mb}$ ) to other SNPs). However, even after harsh pruning, there can be residual LD that can affect the results. To minimize the effect of residual LD, BUHMBOX uses control samples.

Recall that when we defined the z-scores based on correlations in case samples, we used the formula in equation (8),

$$\mathbf{Y} = \sqrt{N}(\mathbf{R} - \mathbf{P}) = (y_{ij})$$

which means that we should multiply the correlation elements by square root of sample size to obtain z-scores. Now if we use control samples, and let  $\mathbf{R}'$  be the correlation matrix of control individuals, we can define a new  $\mathbf{Y}'$  as

$$\mathbf{Y}' = \sqrt{\frac{NN'}{N+N'}} (\mathbf{R} - \mathbf{R}')$$

where  $N'$  is the control sample size.

Although the basic form of our approach is case-only statistic, using only cases requires a strong assumption of no residual LD. By subtracting control correlations from case correlations to use “*delta-correlations*”, we obtain a more robust statistic against the effect of LD.

### ***Controlling for population stratification***

We correct for population stratification by regressing out PCs from the vector of case/control allele dosage of each locus. Note that we regress out PCs from each locus one by one, not simultaneously from the whole dosage matrix including multiple loci. This way, our approach can be thought of as obtaining partial correlations.

### ***Meta-analysis of BUHMBOX results***

The BUHMBOX statistic is a z-score. Therefore, we can meta-analyze BUHMBOX results using the standard weighted sum of z-score approach, where z-scores are weighted by the square root of the total sample size.

## **POLYGENIC MODELING AND BUHMBOX**

We assessed by simulations whether our method can benefit by taking advantage of a polygenic modeling approach. In GWAS, the use of a stringent threshold (P-value threshold  $t=5 \times 10^{-8}$ ) minimizes false positives, but likely misses true positives due to imperfect power. Therefore, investigators often use a polygenic modeling approach that applies a more liberal threshold to define a larger set of variants<sup>5</sup>. We simulated GWASs



based on the Bayesian polygenic model<sup>6</sup> and employed more liberal values of  $t$  ranging from  $5 \times 10^{-8}$  up to 0.01, to obtain larger sets of variants.

Specifically, We adapted Stahl *et al.*'s Bayesian polygenic model<sup>6</sup>, which predicted 2,231 causal loci among 84,000 independent genome-wide loci for RA. To simulate 2,231 causal variants, we combined 71 independent known loci of RA<sup>7</sup> to an additional 2,160 loci sampled from the joint posterior distribution of RAF and OR presented in Stahl *et al.* For null loci, we also used the null RAF distribution presented in Stahl *et al.* Given this disease model, we simulated a GWAS with 3,964 cases and 12,052 controls (sample sizes from Stahl *et al.*), assuming prevalence of 0.01. Given GWAS results, we used only the top  $k$  GWAS loci defined by p-value threshold  $t$  and their observed odds ratios for BUHMBOX power simulations. We assumed  $N=5,000$  and  $\pi=0.5$  for power evaluation and tried different p-value threshold  $t$  from  $5 \times 10^{-8}$  to 0.01.

We observed that the statistical power of BUHMBOX increased when we included variants with moderately significant p-values (**Supplementary Figure 4**). In this simulation, 29.5% power at  $t=5.0 \times 10^{-8}$  increased up to 88.1% at  $t=3.6 \times 10^{-4}$  and then gradually dropped as we used even more liberal  $t$  values. This shows that BUHMBOX can benefit from polygenic modeling.

## **INTERPRETATION OF BUHMBBOX RESULTS:**

Here we sought to describe in detail what can specifically cause subgroup heterogeneity.

### ***Misclassifications can cause subgroup heterogeneity***

Phenotypic misclassifications can cause subgroup heterogeneity. Suppose that a proportion of diagnosed case individuals were actually case individuals for a different disease. In this situation, the heterogeneity proportion  $\pi$  corresponds to the misclassification proportion.

### ***Molecular subtypes can cause subgroup heterogeneity***

Suppose that disease A can occur because of multiple different molecular pathways, and one of the pathways is shared with disease B. Then, the subgroup that shares a molecular pathway with disease B will show genetic characteristics that are similar to disease B patients.

### ***Phenotypic causality can cause subgroup heterogeneity***

This is a situation that is often called “mediated pleiotropy”<sup>8</sup>. Assume that there are two conditions A and B whose population prevalences are  $K_A$  and  $K_B$ . First, consider the null situation that A and B are not causal to each other. Obviously, B-associated loci will be uncorrelated within A cases. Within A cases, the prevalence of B will be  $K_B$ .

Now consider the situation that B causes A (having condition B increases the chance of acquiring A). Let  $K_{A|B}$  and  $K_{A|\bar{B}}$  be the frequency of A among B patients and among non-B-patients. The population attributable risk of A to B is

$$PAR = K_{A|B} - K_{A|\bar{B}} > 0$$

The population prevalence of A can be written

$$K_A = K_B K_{A|B} + (1 - K_B) K_{A|\bar{B}}$$

Thus, within A cases, the proportion of individuals having B will be

$$K_{B|A} = \frac{K_B K_{A|B}}{K_A} = \frac{K_B K_{A|B}}{K_B K_{A|B} + (1 - K_B) K_{A|\bar{B}}} > F_B$$

In this situation, the heterogeneity proportion  $\pi$  corresponds to the excessive proportion of individuals having B among A cases, that would not have occurred without the causal relationship;

$$\pi = K_{B|A} - K_B$$

which has the following relationship to PAR

$$\pi = \frac{K_B(1-K_B)}{K_A} PAR$$

### ***Whole-group pleiotropy cannot cause subgroup heterogeneity***

Common genetic basis between all patients of A and all patients of B (whole-group pleiotropy) does not cause subgroup heterogeneity. If disease A and B share risk alleles, within A cases, the frequencies of risk alleles for B may increase. However, there will not be a subgroup who has excessive numbers of risk alleles. Instead, the risk alleles will occur independently and homogeneously across all A cases even if only a subset of variants have pleiotropic effects. Thus, there will not be correlations among B-associated-risk alleles among A cases. Note that the prevalence of B may increase

( $K_{B|A} > K_B$ ), but we can think of A cases being sampled from a new homogeneous population which has a larger prevalence of B.

***Inverse causal relationship cannot cause subgroup heterogeneity***

We previously considered the causal relationship of disease B causing A, but now consider the inverse situation that A causes B, while B does not cause A. Again we examine the correlations between B-associated loci in A cases. This is a similar situation to pleiotropy in that we can also think of A cases being sampled from a new population which has a larger prevalence of B. Since there will not be a subgroup, there will not be correlations.

**META-ANALYSIS WITH SCALE DIFFERENCES**

In deriving the strategy to incorporate weights in equation (13), our BUHMBOX method utilized a meta-analytic framework that accounts for the scale or unit differences between studies. Because the description of the framework is long, we pushed the description back to here. We will first introduce the well-known meta-analytic method, fixed effects model, and extend it to account for scale differences.

***Fixed effects model***

We first review the fixed effects model meta-analysis method. Let  $X_i$  be the observed effect size of study  $i$  and  $V_i$  be the variance of it. By definition, z-score is defined  $Z_i = \frac{X_i}{\sqrt{V_i}}$ . Let  $W_i = V_i^{-1}$  be the inverse variance. Under the fixed effects model, we assume that  $X_i$  has mean  $\mu$  that is constant (fixed) across the studies. There are two common

approaches under the fixed effects model: the inverse variance weighted average and the weighted sum of z-scores. Two approaches are related as shown below.

**Inverse variance weighted average** In the inverse variance weighted average approach, the goal is to obtain the best estimate of  $\mu$ . A commonly used estimate is weighted average,  $\bar{X}_i = \frac{\sum_i c_i X_i}{\sum_i c_i}$ , which is an unbiased estimate of  $\mu$  for any  $c_i > 0$ . The variance of  $\bar{X}_i$  is  $\bar{V}_i = \frac{\sum_i c_i^2 V_i}{(\sum_i c_i)^2}$ . To obtain the best estimate, we choose  $c_i$  that minimizes the variance. By the Cauchy-Schwarz inequality,

$$\bar{V}_i = \frac{\sum_i c_i^2 V_i}{(\sum_i c_i)^2} \geq \left( \sum_i \frac{c_i \sqrt{V_i}}{\sum_j c_j} \times \frac{1}{\sqrt{V_i}} \right) / \sum_i \frac{1}{V_i} = 1 / \sum_i \frac{1}{V_i}$$

The equality is achieved when

$$\frac{c_i \sqrt{V_i}}{\sum_j c_j} = k \cdot \frac{1}{\sqrt{V_i}}$$

for a constant  $k > 0$ . Without losing generality, we can assume  $\sum_j c_j$  is a constant. Thus, we can achieve the equality by choosing  $c_i = W_i$ , which is why the method is called inverse variance weighted average. Given these weights, the average estimate and its variance are

$$\bar{X} = \frac{\sum_i W_i X_i}{\sum_i W_i} \tag{15}$$

$$\bar{V} = \frac{1}{\sum_i W_i} \tag{16}$$

**Weighted sum of z-scores** In the weighted sum of z-scores approach, the goal is to maximize the power of statistic. Given z-scores  $Z_i = \frac{X_i}{\sqrt{V_i}}$ , we can define a weighted sum of z-scores statistic  $\bar{Z} = \frac{\sum_i b_i Z_i}{\sqrt{\sum_i b_i^2}}$ .  $\bar{Z}$  is also a z-score (normally distributed and of

variance 1) for any weights  $b_i > 0$ . To maximize power, we want to maximize the non-centrality parameter of  $\bar{Z}$ ,  $E[\bar{Z}]$ . Since in each study  $E[Z_i] = \frac{\mu}{\sqrt{V_i}}$ , we have

$$E[\bar{Z}] = \frac{\sum_i b_i \mu / \sqrt{V_i}}{\sqrt{\sum_i b_i^2}}$$

Again, by the Cauchy-Schwarz inequality,

$$E[\bar{Z}] = \mu \cdot \sum_i \frac{b_i}{\sqrt{\sum_j b_j^2}} \cdot \frac{1}{\sqrt{V_i}} \leq \mu \sqrt{\left(\sum_i \frac{b_i^2}{\sum_j b_j^2}\right) \left(\sum_i \frac{1}{V_i}\right)}$$

The equality is achieved when

$$\frac{b_i}{\sqrt{\sum_j b_j^2}} = k \cdot \frac{1}{\sqrt{V_i}}$$

for a constant  $k > 0$ . Without losing generality, we can assume  $\sum_j b_j^2$  is a constant.

Thus, we can achieve the equality by choosing  $b_i = 1/\sqrt{V_i} = \sqrt{W_i}$ . Given these weights, the weighted sum of z-scores statistic is

$$\bar{Z} = \frac{\sum_i \sqrt{W_i} Z_i}{\sqrt{\sum_i W_i}} \tag{17}$$

Note that in many applications, we can approximate  $\sqrt{W_i} \propto \sqrt{N_i p_i (1 - p_i)}$  where  $N_i$  is the sample size of study  $i$  and  $p_i$  is the allele frequency in study  $i$ . If we can assume the allele frequencies are the same for all studies, the weights  $b_i$  approximates to  $\sqrt{N_i}$ , which is the widely used sample-size-based weight for this approach.

**Relation of two approaches** The two approaches, the inverse weighted average and the weighted sum of z-scores, are closely related. Given the inverse variance weighted average and its variance in equations (15) and (16), one can construct a z-score for statistical testing. The z-score is

$$\bar{Z}^* = \bar{X} / \sqrt{\bar{V}} = \frac{\sum_i W_i X_i}{\sum_i W_i} / \frac{1}{\sqrt{\sum_i W_i}} = \frac{\sum_i \sqrt{W_i} Z_i}{\sqrt{\sum_i W_i}} = \bar{Z}$$

, exactly resulting in the same z-score in the weighted sum of z-scores approach in equation (17). Thus, although the goals of the two approaches were different (obtaining the best estimate and maximizing power), the results of statistical test will be exactly the same for the two approaches, or at least similar if we use the approximation  $\sqrt{W_i} \propto \sqrt{N_i p_i (1 - p_i)}$  or  $\sqrt{W_i} \propto \sqrt{N_i}$ .

### ***Fixed effects model with scale differences***

We extend the fixed effects model (FE) to a new model accounting for scale differences. We use the similar notations; let  $X_i$  and  $V_i = W_i^{-1}$  be the observed effect size and its variance in study  $i$ . In the new model, we assume that there is a baseline effect  $\mu$  which is manifested in different scales for each study. We assume that in study  $i$ ,  $X_i$  has mean  $\mu_i = \rho_i \mu$ , where  $\rho_i$  is a scaling factor that is known a priori. Under this model, we can also propose the inverse variance weighted average and the weighted sum of z-score approaches.

**Inverse variance weighted average** In this approach, our goal is to obtain the best estimate of  $\mu$ . In each study, we can define  $Y_i = \frac{X_i}{\rho_i}$ , an estimator of  $\mu$ . The variance of  $Y_i$  is  $Var(Y_i) = V_i / \rho_i^2$ . We can define the weighted average estimate for  $\mu$ ,

$$\bar{Y} = \frac{\sum_i c_i Y_i}{\sum_i c_i}$$

Using Cauchy-Schwarz inequality, we can show that the variance of  $\bar{Y}$  is minimum when

$c_i = \frac{1}{\text{var}(Y_i)} = \frac{\rho_i^2}{v_i}$ . Given these weights, the average estimate and its variance are

$$\bar{Y} = \frac{\sum_i \rho_i W_i X_i}{\sum_i \rho_i^2 W_i} \tag{18}$$

$$\text{Var}(\bar{Y}) = \frac{1}{\sum_i \rho_i^2 W_i} \tag{19}$$

**Weighted sum of z-scores** Given z-scores  $Z_i = \frac{Y_i}{\sqrt{\text{var}(Y_i)}} = \frac{X_i}{\sqrt{v_i}}$ , we can construct a weighted sum of z-scores statistic,  $\hat{Z} = \frac{\sum_i b_i Z_i}{\sqrt{\sum_i b_i^2}}$ . Since in each study  $E[Z_i] = \frac{\rho_i \mu}{\sqrt{v_i}}$ , we

have

$$E[\hat{Z}] = \frac{\sum_i b_i \rho_i \mu / \sqrt{v_i}}{\sqrt{\sum_i b_i^2}}$$

Again, by the Cauchy-Schwarz inequality,

$$E[\hat{Z}] = \mu \cdot \sum_i \frac{b_i}{\sqrt{\sum_j b_j^2}} \cdot \frac{\rho_i}{\sqrt{v_i}} \leq \mu \sqrt{\left(\sum_i \frac{b_i^2}{\sum_j b_j^2}\right) \left(\sum_i \frac{\rho_i^2}{v_i}\right)}$$

The equality is achieved when

$$\frac{b_i}{\sqrt{\sum_j b_j^2}} = k \cdot \frac{\rho_i}{\sqrt{v_i}}$$



for a constant  $k > 0$ . Thus, we can achieve the equality by choosing  $b_i = \rho_i / \sqrt{V_i} = \rho_i \sqrt{W_i}$ . In other words, the scaling factor  $\rho_i$  is directly multiplied to the original z-score weights used in FE. Given these weights, the weighted sum of z-scores statistic is

$$\hat{Z} = \frac{\sum_i \rho_i \sqrt{W_i} Z_i}{\sqrt{\sum_i \rho_i^2 W_i}} \quad (20)$$

**Relation of two approaches** The two approaches, the inverse weighted average and the weighted sum of z-scores, have close relation in the new model, as they have close relation in FE. Given the inverse variance weighted average and its variance in equations (18) and (19), one can construct a z-score for statistical testing. The z-score is

$$\hat{Z}^* = \bar{Y} / \sqrt{Var(\bar{Y})} = \frac{\sum_i \rho_i W_i X_i}{\sum_i \rho_i^2 W_i} / \frac{1}{\sqrt{\sum_i \rho_i^2 W_i}} = \frac{\sum_i \rho_i \sqrt{W_i} Z_i}{\sqrt{\sum_i \rho_i^2 W_i}} = \hat{Z}$$

, exactly resulting in the same z-score in the weighted sum of z-scores approach in equation (20). Thus, the results of statistical test will be the same for the two approaches, or similar if we use the approximation  $\sqrt{W_i} \propto \sqrt{N_i p_i (1 - p_i)}$  or  $\sqrt{W_i} \propto \sqrt{N_i}$ .

## REFERENCES

1. Jennrich, R.I. An asymptotic  $\chi^2$  test for the equality of two correlation matrices. *J Am Statist Assoc* **65**, 904-912 (1970).
2. Wei, L.J., Lin, D.Y. & Weissfeld, L. Regression analysis of multivariate incomplete failure time data by modeling marginal distributions. *J Am Statist Assoc* **84**, 1065-1073 (1989).
3. Wei, L.J. & Johnson, W.E. Combining dependent tests with incomplete repeated measurements. *Biometrika* **72**, 359-364 (1985).
4. Lin, D.Y. & Sullivan, P.F. Meta-analysis of genome-wide association studies with overlapping subjects. *Am J Hum Genet* **85**, 862-872 (2009).
5. International Schizophrenia Consortium. Common polygenic variation contributes to risk of schizophrenia and bipolar disorder. *Nature* **460**, 748-752 (2009).
6. Stahl, E.A. *et al.* Bayesian inference analyses of the polygenic architecture of rheumatoid arthritis. *Nat Genet* **44**, 483-489 (2012).
7. Eyre, S. *et al.* High-density genetic mapping identifies new susceptibility loci for rheumatoid arthritis. *Nat Genet* **44**, 1336-1340 (2012).
8. Solovieff, N., Cotsapas, C., Lee, P.H., Purcell, S.M. & Smoller, J.W. Pleiotropy in complex traits: challenges and strategies. *Nat Rev Genet* **14**, 483-495 (2013).

## Supplementary Tables

**Supplementary Table 1. Null and alternative hypotheses of GRS and BUHMBOX**

| <b>GRS approach</b>       |     | Subgroup Heterogeneity |                        |
|---------------------------|-----|------------------------|------------------------|
|                           |     | No                     | Yes                    |
| Whole-group<br>Pleiotropy | No  | Null hypothesis        | Alternative hypothesis |
|                           | Yes | Alternative hypothesis | Alternative hypothesis |

| <b>BUHMBOX</b>            |     | Subgroup Heterogeneity |                        |
|---------------------------|-----|------------------------|------------------------|
|                           |     | No                     | Yes                    |
| Whole-group<br>Pleiotropy | No  | Null hypothesis        | Alternative hypothesis |
|                           | Yes | Null hypothesis        | Alternative hypothesis |

**Supplementary Table 2. False positive rate of BUHMBOX**

We simulated a million null studies assuming sample size  $N=2,000$  and number of risk loci  $M=50$ . Then given threshold  $\alpha$ , the false positive rate was estimated as the proportion of simulated studies with p-value  $\leq \alpha$ .

| True threshold $\alpha$ | False positive rate |
|-------------------------|---------------------|
| 0.05                    | 0.051               |
| 0.01                    | 0.011               |
| 0.005                   | 0.0056              |
| 0.001                   | 0.0012              |
| 0.0005                  | 0.00060             |

Han Pouget et al

**Supplementary Table 3. Detailed SNP information used for GRS and BUHMBOX analyses**

Please refer to separate Excel file.

**Supplementary Table 4. GRS and BUHMBOX results**  
Please refer to separate Excel file.

**Supplementary Table 5. MDD sample description****Full dataset (used for BUHMBOX analysis)**

| Study                                                                       | Tag          | N Total       | N Cases      |
|-----------------------------------------------------------------------------|--------------|---------------|--------------|
| Genetic Association Information Network (GAIN)-MDD <sup>1</sup>             | gain         | 3,461         | 1,694        |
| Genetics of Recurrent Early-Onset Depression <sup>2</sup>                   | genred       | 2,283         | 1,030        |
| Glaxo-Smith-Kline (GSK) <sup>3</sup>                                        | gsk          | 1,751         | 887          |
| MDD2000 <sup>4</sup>                                                        | mdd2kb       | 1,184         | 433          |
|                                                                             | mdd2ks       | 1,977         | 1,017        |
| Max Planck Institute of Psychiatry, Munich <sup>5</sup>                     | munich       | 913           | 376          |
| RADIANT-GERMANY <sup>6</sup> and Bonn/Mannheim <sup>7</sup>                 | radbon       | 2,225         | 935          |
| RADIANT-UK <sup>6</sup>                                                     | raduk        | 3,213         | 1,625        |
| Sequenced Treatment Alternatives to Relieve Depression (STARD) <sup>8</sup> | stardfull    | 1,752         | 1,241        |
|                                                                             | <b>Total</b> | <b>16,759</b> | <b>9,238</b> |

**Schizophrenia-GWAS-independent dataset (used for GRS analysis)**

| Study                                                                       | Tag          | N Controls   | N Cases      |
|-----------------------------------------------------------------------------|--------------|--------------|--------------|
| Genetic Association Information Network (GAIN)-MDD <sup>1</sup>             | gain         | 1,682        | 1,693        |
| MDD2000 <sup>4</sup>                                                        | mdd2kb       | 751          | 433          |
|                                                                             | mdd2ks       | 960          | 1,016        |
| Max Planck Institute of Psychiatry, Munich <sup>5</sup>                     | munich       | 537          | 375          |
| RADIANT-UK <sup>6</sup>                                                     | raduk        | 1,583        | 1,624        |
| Sequenced Treatment Alternatives to Relieve Depression (STARD) <sup>8</sup> | stardfull    | 101          | 1,241        |
|                                                                             | <b>Total</b> | <b>5,614</b> | <b>6,382</b> |

1. Sullivan, P.F. *et al.* Genome-wide association for major depressive disorder: a possible role for the presynaptic protein piccolo. *Mol Psychiatry* **14**, 359-375 (2009).
2. Shi, J. *et al.* Genome-wide association study of recurrent early-onset major depressive disorder. *Mol Psychiatry* **16**, 193-201 (2011).
3. Muglia, P. *et al.* Genome-wide association study of recurrent major depressive disorder in two European case-control cohorts. *Mol Psychiatry* **15**, 589-601 (2010).
4. Wray, N.R. *et al.* Genome-wide association study of major depressive disorder: new results, meta-analysis, and lessons learned. *Mol Psychiatry* **17**, 36-48 (2012).
5. Kohli, M.A. *et al.* The neuronal transporter gene SLC6A15 confers risk to major depression. *Neuron* **70**, 252-265 (2011).
6. Lewis, C.M. *et al.* Genome-wide association study of major recurrent depression in the U.K. population. *Am J Psychiatry* **167**, 949-957 (2010).
7. Rietschel, M. *et al.* Genome-wide association-, replication-, and neuroimaging study implicates HOMER1 in the etiology of major depression. *Biol Psychiatry* **68**, 578-585 (2010).
8. Shyn, S.I. *et al.* Novel loci for major depression identified by genome-wide association study of Sequenced Treatment Alternatives to Relieve Depression and meta-analysis of three studies. *Mol Psychiatry* **16**, 202-215 (2011).
9. Cross-Disorder Group of the Psychiatric Genomics Consortium. Identification of risk loci with shared effects on five major psychiatric disorders: a genome-wide analysis. *Lancet* **381**, 1371-1379 (2013).
10. Cross-Disorder Group of the Psychiatric Genomics Consortium. Genetic relationship between five psychiatric disorders estimated from genome-wide SNPs. *Nat Genet* **45**, 984-994 (2013).
11. Bulik-Sullivan, B. *et al.* An atlas of genetic correlations across human diseases and traits. *Nat Genet* (2015).

**Supplementary Table 6. Summary of selected previous estimates of genetic overlap between MDD and SCZ**

| Study                                         | Method                                     | MDD results                                       | BPD Results                                       |
|-----------------------------------------------|--------------------------------------------|---------------------------------------------------|---------------------------------------------------|
| Cross-Disorder Group of the PGC <sup>9</sup>  | Polygenic risk scoring, $p_T=1$ (all SNPs) | $R^2=0.009$ , $p<1 \times 10^{-16}$               | $R^2=0.025$ , $p<1 \times 10^{-50}$               |
| Cross-Disorder Group of the PGC <sup>10</sup> | REML                                       | $r_g=0.43$ , $SE=0.06$ , $p<1.0 \times 10^{-16}$  | $r_g=0.68$ , $SE=0.04$ , $p=6.0 \times 10^{-15}$  |
| Bulik-Sullivan <i>et al.</i> <sup>11</sup>    | LDSR                                       | $r_g=0.51$ , $SE=0.08$ , $p=1.32 \times 10^{-11}$ | $r_g=0.79$ , $SE=0.04$ , $p=7.45 \times 10^{-94}$ |

1. Cross-Disorder Group of the Psychiatric Genomics Consortium. Identification of risk loci with shared effects on five major psychiatric disorders: a genome-wide analysis. *Lancet* **381**, 1371-1379 (2013).
2. Cross-Disorder Group of the Psychiatric Genomics Consortium. Genetic relationship between five psychiatric disorders estimated from genome-wide SNPs. *Nat Genet* **45**, 984-994 (2013).
3. Bulik-Sullivan B. *et al.* An atlas of genetic correlations across human diseases and traits. *Nat Genet* **47**, 1236-1241 (2015).

## Members of the Major Depressive Disorder Working Group of the Psychiatric Genomics Consortium

| Subgroup        | Published Name        | Institution                                                                         | Department                                         | City        | State             | Country |
|-----------------|-----------------------|-------------------------------------------------------------------------------------|----------------------------------------------------|-------------|-------------------|---------|
|                 | Patrick F Sullivan    | Karolinska Institutet                                                               | Medical Epidemiology and Biostatistics             | Stockholm   |                   | SE      |
|                 |                       | University of North Carolina at Chapel Hill                                         | Genetics                                           | Chapel Hill | NC                | US      |
|                 |                       | University of North Carolina at Chapel Hill                                         | Psychiatry                                         | Chapel Hill | NC                | US      |
|                 | Stephan Ripke         | Charité Universitätsmedizin Berlin Campus Benjamin Franklin                         | Department of Psychiatry                           | Berlin      | Berlin            | DE      |
|                 |                       | Broad Institute                                                                     | Medical and Population Genetics                    | Cambridge   | MA                | US      |
|                 |                       | Massachusetts General Hospital                                                      | Analytic and Translational Genetics Unit           | Boston      | MA                | US      |
|                 | Danielle Posthuma     | VU Medical Center                                                                   | Clinical Genetics                                  | Amsterdam   | Noord-Holland     | NL      |
|                 |                       | VU University Amsterdam                                                             | Complex Trait Genetics                             | Amsterdam   |                   | NL      |
| Rotterdam Study | Henning Tiemeier      | Erasmus MC                                                                          | Psychiatry                                         | Rotterdam   | Zuid-Holland      | NL      |
| Rotterdam Study | Henning Tiemeier      | Erasmus MC                                                                          | Epidemiology                                       | Rotterdam   | Zuid-Holland      | NL      |
| Rotterdam Study | Henning Tiemeier      | Erasmus MC                                                                          | Child and Adolescent Psychiatry                    | Rotterdam   | Zuid-Holland      | NL      |
| Rotterdam Study | André G Uitterlinden  | Erasmus MC                                                                          | Internal Medicine                                  | Rotterdam   | Zuid-Holland      | NL      |
| Rotterdam Study | Nese Direk            | Erasmus MC                                                                          | Epidemiology                                       | Rotterdam   | South-Holland     | NL      |
| Rotterdam Study | Saira Saeed Mirza     | Erasmus MC                                                                          | Epidemiology                                       | Rotterdam   | Zuid-Holland      | NL      |
| Rotterdam Study | Albert Hofman         | Erasmus MC                                                                          | Epidemiology                                       | Rotterdam   | Zuid-Holland      | NL      |
| MARS            | Susanne Lucae         | Max Planck Institute of Psychiatry                                                  |                                                    | Munich      |                   | DE      |
| MARS            | Stefan Kloiber        | Max Planck Institute of Psychiatry                                                  |                                                    | Munich      |                   | DE      |
| MARS            | Klaus Berger          | University of Muenster                                                              | Institute of Epidemiology and Social Medicine      | Muenster    |                   | DE      |
| MARS            | Jürgen Wellmann       | University of Muenster                                                              | Institute of Epidemiology and Social Medicine      | Muenster    |                   | DE      |
| MARS            | Bertram Müller-Myhsok | Munich Cluster for Systems Neurology (SyNergy)                                      |                                                    | Munich      |                   | DE      |
| MARS            | Bertram Müller-Myhsok | University of Liverpool                                                             |                                                    | Liverpool   |                   | GB      |
| MARS            | Bertram Müller-Myhsok | Max Planck Institute of Psychiatry                                                  | Department of Translational Research in Psychiatry | Munich      |                   | DE      |
| JANSSEN         | Qingqin S Li          | Janssen Research and Development, LLC                                               | Neuroscience Therapeutic Area                      | Titusville  | NJ                | US      |
| GSK_MUNICH      | Bertram Müller-Myhsok | Munich Cluster for Systems Neurology (SyNergy)                                      |                                                    | Munich      |                   | DE      |
| GSK_MUNICH      | Bertram Müller-Myhsok | University of Liverpool                                                             |                                                    | Liverpool   |                   | GB      |
| GSK_MUNICH      | Bertram Müller-Myhsok | Max Planck Institute of Psychiatry                                                  | Department of Translational Research in Psychiatry | Munich      |                   | DE      |
| GSK_MUNICH      | Marcus Ising          | Max Planck Institute of Psychiatry                                                  |                                                    | Munich      |                   | DE      |
| GSK_MUNICH      | Till F M Andlauer     | Max Planck Institute of Psychiatry                                                  | Department of Translational Research in Psychiatry | Munich      |                   | DE      |
| GSK_MUNICH      | Till F M Andlauer     | Munich Cluster for Systems Neurology (SyNergy)                                      |                                                    | Munich      |                   | DE      |
| GSK_MUNICH      | Susanne Lucae         | Max Planck Institute of Psychiatry                                                  |                                                    | Munich      |                   | DE      |
| GSK_MUNICH      | Stefan Kloiber        | Max Planck Institute of Psychiatry                                                  |                                                    | Munich      |                   | DE      |
| BoMa            | Marcella Rietschel    | Central Institute of Mental Health, Medical Faculty Mannheim, Heidelberg University | Department of Genetic Epidemiology in Psychiatry   | Mannheim    | Baden-Württemberg | DE      |
| BoMa            | Andreas J Forstner    | University of Bonn                                                                  | Institute of Human Genetics                        | Bonn        |                   | DE      |



# Han Pouget et al

|                   |                       |                                                                                           |                                                                |            |                       |    |
|-------------------|-----------------------|-------------------------------------------------------------------------------------------|----------------------------------------------------------------|------------|-----------------------|----|
| BoMa              | Andreas J Forstner    | University of Bonn<br>Central Institute of Mental Health,<br>Medical Faculty Mannheim,    | Life&Brain Center, Department<br>of Genomics                   | Bonn       |                       | DE |
| BoMa              | Fabian Streit         | Heidelberg University<br>Central Institute of Mental Health,<br>Medical Faculty Mannheim, | Department of Genetic<br>Epidemiology in Psychiatry            | Mannheim   | Baden<br>Württemberg  | DE |
| BoMa              | Jana Strohmaier       | Heidelberg University<br>Central Institute of Mental Health,<br>Medical Faculty Mannheim, | Department of Genetic<br>Epidemiology in Psychiatry            | Mannheim   |                       | DE |
| BoMa              | Maren Lang            | Heidelberg University<br>Central Institute of Mental Health,<br>Medical Faculty Mannheim, | Department of Genetic<br>Epidemiology in Psychiatry            | Mannheim   | Baden-<br>Württemberg | DE |
| BoMa              | Josef Frank           | Heidelberg University                                                                     | Department of Genetic<br>Epidemiology in Psychiatry            | Mannheim   | Baden-<br>Württemberg | DE |
| BoMa              | Stefan Herms          | University of Basel                                                                       | Division of Medical Genetics and<br>Department of Biomedicine  | Basel      |                       | CH |
| BoMa              | Stefan Herms          | University of Bonn                                                                        | Institute of Human Genetics                                    | Bonn       | NRW                   | DE |
| BoMa              | Stefan Herms          | University of Bonn<br>Central Institute of Mental Health,<br>Medical Faculty Mannheim,    | Life&Brain Center, Department<br>of Genomics                   | Bonn       | NRW                   | DE |
| BoMa              | Stephanie H Witt      | Heidelberg University<br>Central Institute of Mental Health,<br>Medical Faculty Mannheim, | Department of Genetic<br>Epidemiology in Psychiatry            | Mannheim   |                       | DE |
| BoMa              | Jens Treutlein        | Heidelberg University                                                                     | Department of Genetic<br>Epidemiology in Psychiatry            | Mannheim   |                       | DE |
| BoMa              | Markus M Nöthen       | University of Bonn                                                                        | Institute of Human Genetics                                    | Bonn       |                       | DE |
| BoMa              | Markus M Nöthen       | University of Bonn                                                                        | Life&Brain Center, Department<br>of Genomics                   | Bonn       |                       | DE |
| BoMa              | Sven Cichon           | University of Basel                                                                       | Department of Biomedicine                                      | Basel      |                       | CH |
| BoMa              | Sven Cichon           | University of Basel                                                                       | Division of Medical Genetics                                   | Basel      |                       | CH |
| BoMa              | Sven Cichon           | Research Center Juelich                                                                   | Institute of Neuroscience and<br>Medicine (INM-1)              | Juelich    |                       | DE |
| BoMa              | Sven Cichon           | University of Bonn                                                                        | Institute of Human Genetics                                    | Bonn       |                       | DE |
| BoMa              | Franziska Degenhardt  | University of Bonn                                                                        | Institute of Human Genetics                                    | Bonn       |                       | DE |
| BoMa              | Franziska Degenhardt  | University of Bonn                                                                        | Life&Brain Center, Department<br>of Genomics                   | Bonn       |                       | DE |
| BoMa              | Per Hoffmann          | University of Basel                                                                       | Human Genomics Research<br>Group, Department of<br>Biomedicine | Basel      |                       | CH |
| BoMa              | Per Hoffmann          | University of Bonn                                                                        | Institute of Human Genetics                                    | Bonn       |                       | DE |
| BoMa              | Per Hoffmann          | University of Bonn                                                                        | Life&Brain Center, Department<br>of Genomics                   | Bonn       |                       | DE |
| BoMa              | Thomas G Schulze      | Medical Center of the University of<br>Munich, Campus Innenstadt                          | Institute of Psychiatric<br>Phenomics and Genomics<br>(IPPG)   | Munich     | Bayern                | DE |
| BoMa              | Thomas G Schulze      | University Medical Center<br>Göttingen                                                    | Department of Psychiatry and<br>Psychotherapy                  | Goettingen | Niedersachse<br>n     | DE |
| BoMa              | Thomas G Schulze      | Johns Hopkins University                                                                  | Department of Psychiatry and<br>Behavioral Sciences            | Baltimore  | MD                    | US |
| BoMa              | Thomas G Schulze      | NIMH Division of Intramural<br>Research Programs                                          | Human Genetics Branch                                          | Bethesda   | MD                    | US |
| BoMa              | Thomas G Schulze      | Central Institute of Mental Health                                                        | Department of Genetic<br>Epidemiology in Psychiatry            | Mannheim   |                       | DE |
| CoFaMS - Adelaide | Bernhard T Baune      | University of Adelaide                                                                    | Discipline of Psychiatry                                       | Adelaide   | SA                    | AU |
| CoFaMS - Adelaide | Udo Dannlowski        | University of Marburg                                                                     | Department of Psychiatry                                       | Marburg    | Hessen                | DE |
| CoFaMS - Adelaide | Udo Dannlowski        | University of Münster                                                                     | Department of Psychiatry                                       | Münster    |                       | DE |
| CoFaMS - Adelaide | Tracy M Air           | University of Adelaide                                                                    | Discipline of Psychiatry                                       | Adelaide   | SA                    | AU |
| CoFaMS - Adelaide | Grant C B Sinnamon    | James Cook University                                                                     | School of Medicine and Dentistry                               | Townsville | QLD                   | AU |
| CoFaMS - Adelaide | Naomi R Wray          | The University of Queensland                                                              | Queensland Brain Institute                                     | Brisbane   | QLD                   | AU |
| EDINBURGH         | Andrew M McIntosh     | University of Edinburgh                                                                   | Division of Psychiatry                                         | Edinburgh  | Edinburgh             | GB |
| EDINBURGH         | Douglas H R Blackwood | University of Edinburgh                                                                   | Division of Psychiatry                                         | Edinburgh  |                       | GB |
| EDINBURGH         | Toni-Kim Clarke       | University of Edinburgh                                                                   | Division of Psychiatry                                         | Edinburgh  |                       | GB |
| EDINBURGH         | Donald J MacIntyre    | University of Edinburgh                                                                   | Division of Psychiatry                                         | Edinburgh  | Edinburgh             | GB |
| GENSCOT           | Andrew M McIntosh     | University of Edinburgh                                                                   | Division of Psychiatry                                         | Edinburgh  | Edinburgh             | GB |

# Han Pouget et al

|                    |                         |                                                                     |                                                                                                                               |             |                              |    |
|--------------------|-------------------------|---------------------------------------------------------------------|-------------------------------------------------------------------------------------------------------------------------------|-------------|------------------------------|----|
| GENSCOT            | David J Porteous        | University of Edinburgh                                             | Medical Genetics Section, CGEM, IGMM                                                                                          | Edinburgh   | Edinburgh                    | GB |
| GENSCOT            | Toni-Kim Clarke         | University of Edinburgh                                             | Division of Psychiatry                                                                                                        | Edinburgh   |                              | GB |
| GENSCOT            | Donald J MacIntyre      | University of Edinburgh                                             | Division of Psychiatry<br>Medical Research Council<br>Human Genetics Unit, Institute<br>of Genetics and Molecular<br>Medicine | Edinburgh   | Edinburgh                    | GB |
| GENSCOT            | Caroline Hayward        | University of Edinburgh                                             |                                                                                                                               | Edinburgh   | Edinburgh                    | GB |
| EGCUT              | Tõnu Esko               | University of Tartu                                                 | Estonian Genome Center<br>Program in Medical and<br>Population Genetics                                                       | Tartu       |                              | EE |
| EGCUT              | Tõnu Esko               | Broad Institute                                                     |                                                                                                                               | Cambridge   | MA                           | US |
| EGCUT              | Tõnu Esko               | Children's Hospital Boston                                          | Division of Endocrinology                                                                                                     | Boston      | MA                           | US |
| EGCUT              | Tõnu Esko               | Harvard Medical School                                              | Department of Genetics                                                                                                        | Boston      | MA                           | US |
| EGCUT              | Evelin Mihailov         | University of Tartu                                                 | Estonian Genome Center                                                                                                        | Tartu       |                              | EE |
| EGCUT              | Evelin Mihailov         | Estonian Biocentre                                                  |                                                                                                                               | Tartu       | Tartumaa                     | EE |
| EGCUT              | Lili Milani             | University of Tartu                                                 | Estonian Genome Center                                                                                                        | Tartu       |                              | EE |
| EGCUT              | Andres Metspalu         | University of Tartu                                                 | Estonian Genome Center<br>Institute of Molecular and Cell<br>Biology                                                          | Tartu       |                              | EE |
| EGCUT              | Andres Metspalu         | University of Tartu                                                 |                                                                                                                               | Tartu       |                              | EE |
| SHIP-LEGEND/TREND  | Hans J Grabe            | University Medicine Greifswald                                      | Department of Psychiatry and<br>Psychotherapy                                                                                 | Greifswald  |                              | DE |
| SHIP-LEGEND/TREND  | Henry Völzke            | University Medicine Greifswald                                      | Institute for Community Medicine                                                                                              | Greifswald  |                              | DE |
| SHIP-LEGEND/TREND  | Alexander Teumer        | University Medicine Greifswald                                      | Institute for Community Medicine<br>Department of Psychiatry and<br>Psychotherapy                                             | Greifswald  | Mecklenburg-<br>Vorpommern   | DE |
| SHIP-LEGEND/TREND  | Sandra Van der Auwera   | University Medicine Greifswald                                      | Interfaculty Institute for Genetics<br>and Functional Genomics,<br>Department of Functional<br>Genomics                       | Greifswald  | Mecklenburg-<br>Vorpommern   | DE |
| SHIP-LEGEND/TREND  | Georg Homuth            | University Medicine and Ernst<br>Moritz Arndt University Greifswald | Institute of Clinical Chemistry<br>and Laboratory Medicine                                                                    | Greifswald  | Mecklenburg-<br>Vorpommern   | DE |
| SHIP-LEGEND/TREND  | Matthias Nauck          | University Medicine Greifswald                                      |                                                                                                                               | Greifswald  | Mecklenburg-<br>Vorpommern   | DE |
| RADIANT            | Cathryn M Lewis         | King's College London                                               | Department of Medical &<br>Molecular Genetics<br>MRC Social Genetic and<br>Developmental Psychiatry<br>Centre                 | London      | London                       | GB |
| RADIANT            | Cathryn M Lewis         | King's College London                                               |                                                                                                                               | London      | London                       | GB |
| RADIANT            | Gerome Breen            | King's College London                                               | NIHR BRC for Mental Health<br>MRC Social Genetic and<br>Developmental Psychiatry<br>Centre                                    | London      | London                       | GB |
| RADIANT            | Gerome Breen            | King's College London                                               |                                                                                                                               | London      | London                       | GB |
| RADIANT            | Margarita Rivera        | University of Granada                                               | Instituto de Investigación<br>Biosanitaria IBS-Granada and<br>CIBER en Salud Mental<br>(CIBERSAM)                             | Granada     | Granada                      | ES |
| RADIANT            | Margarita Rivera        | King's College London                                               | MRC Social Genetic and<br>Developmental Psychiatry<br>Centre                                                                  | London      | London                       | GB |
| RADIANT            | Michael Gill            | Trinity College Dublin                                              | Department of Psychiatry                                                                                                      | Dublin      |                              | IE |
| RADIANT            | Nick Craddock           | Cardiff University<br>Washington University in Saint<br>Louis       | Psychological Medicine                                                                                                        | Cardiff     | Cardiff                      | GB |
| RADIANT            | John P Rice             |                                                                     | Department of Psychiatry<br>MRC Centre for<br>Neuropsychiatric Genetics and<br>Genomics                                       | Saint Louis | MO                           | US |
| RADIANT            | Michael J Owen          | Cardiff University School of<br>Medicine                            | MRC Social Genetic and<br>Developmental Psychiatry<br>Centre                                                                  | Cardiff     | Cardiff                      | GB |
| RADIANT            | Peter McGuffin          | King's College London                                               |                                                                                                                               | London      | London                       | GB |
| Danish Radiant     | Henriette N Buttenschøn | Aarhus University                                                   | Department of Clinical Medicine,<br>Translational Neuropsychiatry<br>Unit                                                     | Aarhus      | Central<br>Denmark<br>Region | DK |
| Danish Radiant     | Ole Mors                | Aarhus University Hospital, Risskov                                 | Research Department P                                                                                                         | Aarhus      | Central<br>Denmark<br>Region | DK |
| Danish replication | Henriette N Buttenschøn | Aarhus University                                                   | Department of Clinical Medicine,<br>Translational Neuropsychiatry<br>Unit                                                     | Aarhus      | Central<br>Denmark<br>Region | DK |
| Danish replication | Ole Mors                | Aarhus University Hospital, Risskov                                 | Research Department P                                                                                                         | Aarhus      | Central<br>Denmark<br>Region | DK |

|                    |                         |                                                                                               |                                                                                                                                                                           |             | Region     |    |
|--------------------|-------------------------|-----------------------------------------------------------------------------------------------|---------------------------------------------------------------------------------------------------------------------------------------------------------------------------|-------------|------------|----|
| Danish replication | Anders D Børglum        | iPSYCH, Lundbeck Foundation Initiative for Integrative Psychiatric Research                   |                                                                                                                                                                           | Aarhus      |            | DK |
| Danish replication | Anders D Børglum        | Aarhus University iPSYCH, Lundbeck Foundation Initiative for Integrative Psychiatric Research | iSEQ, Centre for Integrative Sequencing, Department of Biomedicine                                                                                                        | Aarhus      |            | DK |
| Danish replication | Jakob Grove             | Aarhus University                                                                             | iSEQ, Centre for Integrative Sequencing                                                                                                                                   | Aarhus      |            | DK |
| Danish replication | Jakob Grove             | Aarhus University                                                                             | Bioinformatics Research Centre (BIRC)                                                                                                                                     | Aarhus      |            | DK |
| Danish replication | Jakob Grove             | Aarhus University                                                                             | Department of Biomedicine                                                                                                                                                 | Aarhus      |            | DK |
| Danish replication | Jesper Krogh            | University of Copenhagen                                                                      | Department of Endocrinology at Herlev University Hospital                                                                                                                 | Copenhagen  |            | DK |
| Roche MDD          | Enrico Domenici         | F. Hoffmann-La Roche Ltd                                                                      | Roche Pharmaceutical Research and Early Development, Neuroscience, Ophthalmology and Rare Diseases Discovery & Translational Medicine Area, Roche Innovation Center Basel | Basel       |            | CH |
| Roche MDD          | Daniel Umbricht         | F. Hoffmann-La Roche Ltd                                                                      | Roche Pharmaceutical Research and Early Development, Neuroscience, Ophthalmology and Rare Diseases Discovery & Translational Medicine Area, Roche Innovation Center Basel | Basel       |            | CH |
| Roche MDD          | Jorge A Quiroz          | F. Hoffmann-La Roche Ltd                                                                      | Roche Pharmaceutical Research and Early Development, Neuroscience, Ophthalmology and Rare Diseases Discovery & Translational Medicine Area, Roche Innovation Center Basel | Basel       |            | CH |
| Roche MDD          | Carsten Horn            | F. Hoffmann-La Roche Ltd                                                                      | Pharmaceutical Sciences, Roche Innovation Center Basel                                                                                                                    | Basel       |            | CH |
| QIMR               | Enda M Byrne            | The University of Queensland                                                                  | Queensland Brain Institute                                                                                                                                                | Brisbane    | QLD        | AU |
| QIMR               | Baptiste Couvy-Duchesne | QIMR Berghofer Medical Research Institute                                                     | Genetics and Computational Biology                                                                                                                                        | Herston     | QLD        | AU |
| QIMR               | Baptiste Couvy-Duchesne | The University of Queensland                                                                  | Centre for Advanced Imaging                                                                                                                                               | Saint Lucia | QLD        | AU |
| QIMR               | Baptiste Couvy-Duchesne | The University of Queensland                                                                  | School of Psychology                                                                                                                                                      | Saint Lucia | QLD        | AU |
| QIMR               | Scott D Gordon          | QIMR Berghofer Medical Research Institute                                                     | Genetics and Computational Biology                                                                                                                                        | Brisbane    | Queensland | AU |
| QIMR               | Andrew C Heath          | Washington University in Saint Louis School of Medicine                                       | Psychiatry                                                                                                                                                                | Saint Louis | MO         | US |
| QIMR               | Anjali K Henders        | The University of Queensland                                                                  | Queensland Brain Institute                                                                                                                                                | Brisbane    | QLD        | AU |
| QIMR               | IB Hickie               | University of Sydney                                                                          | Brain and Mind Research Institute                                                                                                                                         | Sydney      | NSW        | AU |
| QIMR               | Pamela AF Madden        | Washington University in Saint Louis School of Medicine                                       | Department of Psychiatry                                                                                                                                                  | Saint Louis | MO         | US |
| QIMR               | Nicholas G Martin       | The University of Queensland                                                                  | School of Psychology                                                                                                                                                      | Brisbane    | QLD        | AU |
| QIMR               | Nicholas G Martin       | QIMR Berghofer Medical Research Institute                                                     | Genetics and Computational Biology                                                                                                                                        | Brisbane    | Queensland | AU |
| QIMR               | Sarah Elizabeth Medland | QIMR Berghofer Medical Research Institute                                                     | Genetics and Computational Biology                                                                                                                                        | Herston     | QLD        | AU |
| QIMR               | Grant W Montgomery      | QIMR Berghofer Medical Research Institute                                                     | Genetics and Computational Biology                                                                                                                                        | Brisbane    | QLD        | AU |
| QIMR               | Dale R Nyholt           | Queensland University of Technology                                                           | Institute of Health and Biomedical Innovation                                                                                                                             | Brisbane    | QLD        | AU |
| QIMR               | Michele L Pergadia      | Florida Atlantic University                                                                   | Charles E. Schmidt College of Medicine                                                                                                                                    | Boca Raton  | FL         | US |
| QIMR               | Divya Mehta             | The University of Queensland                                                                  | Queensland Brain Institute                                                                                                                                                | Brisbane    | QLD        | AU |
| QIMR               | Naomi R Wray            | The University of Queensland                                                                  | Queensland Brain Institute                                                                                                                                                | Brisbane    | QLD        | AU |
| PsyColaus          | Martin Preisig          | University Hospital of Lausanne                                                               | Department of Psychiatry                                                                                                                                                  | Prilly      | Vaud       | CH |
| PsyColaus          | Enrique Castelao        | University Hospital of Lausanne                                                               | Department of Psychiatry                                                                                                                                                  | Prilly      | Vaud       | CH |
| PsyColaus          | Zoltán Kutalik          | University Hospital of Lausanne                                                               | Institute of Social and Preventive Medicine (IUMSP)                                                                                                                       | Lausanne    | VD         | CH |

# Han Pouget et al

|                |                       |                                                                                  |                                                                                 |               |               |    |
|----------------|-----------------------|----------------------------------------------------------------------------------|---------------------------------------------------------------------------------|---------------|---------------|----|
| PsyColaus      | Zoltán Kutalik        | Swiss Institute of Bioinformatics                                                |                                                                                 | Lausanne      | VD            | CH |
| STAR*D         | Steven P Hamilton     | Kaiser Permanente Northern California                                            | Psychiatry                                                                      | San Francisco | CA            | US |
| GenPod/Newmeds | Katherine E Tansey    | University of Bristol                                                            | MRC Integrative Epidemiology Unit                                               | Bristol       | Bristol       | GB |
| GenPod/Newmeds | Rudolf Uher           | Dalhousie University                                                             | Psychiatry                                                                      | Halifax       | NS            | CA |
| GenPod/Newmeds | Glyn Lewis            | University College London                                                        | Division of Psychiatry<br>MRC Centre for Neuropsychiatric Genetics and Genomics | London        |               | GB |
| GenPod/Newmeds | Michael C O'Donovan   | Cardiff University                                                               |                                                                                 | Cardiff       | Cardiff       | GB |
| NESDA          | Brenda WJH Penninx    | VU University Medical Center and GGZ inGeest                                     | Department of Psychiatry                                                        | Amsterdam     |               | NL |
| NESDA          | Yuri Milaneschi       | VU University Medical Center and GGZ inGeest                                     | Department of Psychiatry                                                        | Amsterdam     |               | NL |
| NESDA          | Wouter J Peyrot       | VU University Medical Center and GGZ inGeest                                     | Department of Psychiatry                                                        | Amsterdam     |               | NL |
| NESDA          | Johannes H Smit       | VU University Medical Center and GGZ inGeest                                     | Department of Psychiatry                                                        | Amsterdam     |               | NL |
| NESDA          | Rick Jansen           | VU University Medical Center and GGZ inGeest                                     | Department of Psychiatry                                                        | Amsterdam     |               | NL |
| NESDA          | Aartjan TF Beekman    | VU University Medical Center and GGZ inGeest                                     | Department of Psychiatry                                                        | Amsterdam     |               | NL |
| NESDA          | Robert Schoevers      | University of Groningen, University Medical Center Groningen                     | Department of Psychiatry                                                        | Groningen     | Groningen     | NL |
| NESDA          | Albert M van Hemert   | Leiden University Medical Center<br>VU University Medical Center and GGZ inGeest | Department of Psychiatry                                                        | Leiden        |               | NL |
| NESDA          | Gerard van Grootheest | GGZ inGeest                                                                      | Department of Psychiatry                                                        | Amsterdam     | Noord-Holland | NL |
| NTR            | Dorret I Boomsma      | VU University Amsterdam                                                          | Dept of Biological Psychology                                                   | Amsterdam     |               | NL |
| NTR            | Jouke- Jan Hottenga   | VU University Amsterdam                                                          | Dept of Biological Psychology                                                   | Amsterdam     |               | NL |
| NTR            | Christel M Middeldorp | VU University Amsterdam                                                          | Dept of Biological Psychology                                                   | Amsterdam     |               | NL |
| NTR            | EJC de Geus           | VU University Medical Center                                                     | EMGO+ Institute                                                                 | Amsterdam     |               | NL |
| NTR            | EJC de Geus           | VU University Amsterdam                                                          | Dept of Biological Psychology                                                   | Amsterdam     |               | NL |
| NTR            | Abdel Abdellaoui      | VU University Amsterdam                                                          | Dept of Biological Psychology                                                   | Amsterdam     |               | NL |
| NTR            | Gonneke Willemsen     | VU University Amsterdam                                                          | Dept of Biological Psychology                                                   | Amsterdam     |               | NL |
| Harvard        | Erin C Dunn           | Broad Institute                                                                  | Stanley Center for Psychiatric Research                                         | Cambridge     | MA            | US |
| Harvard        | Erin C Dunn           | Massachusetts General Hospital                                                   | Department of Psychiatry                                                        | Boston        | MA            | US |
| Harvard        | Erin C Dunn           | Massachusetts General Hospital                                                   | Psychiatric and Neurodevelopmental Genetics Unit (PNGU)                         | Boston        | MA            | US |
| Harvard        | Roy H Perlis          | Harvard Medical School                                                           | Psychiatry                                                                      | Boston        | MA            | US |
| Harvard        | Roy H Perlis          | Massachusetts General Hospital                                                   | Psychiatry                                                                      | Boston        | MA            | US |
| Harvard        | Jordan W Smoller      | Massachusetts General Hospital                                                   | Department of Psychiatry                                                        | Boston        | MA            | US |
| Harvard        | Jordan W Smoller      | Massachusetts General Hospital                                                   | Psychiatric and Neurodevelopmental Genetics Unit (PNGU)                         | Boston        | MA            | US |
| Harvard        | Jordan W Smoller      | Broad Institute                                                                  | Stanley Center for Psychiatric Research                                         | Cambridge     | MA            | US |
| TwinGene       | Patrik K Magnusson    | Karolinska Institutet                                                            | Department of Medical Epidemiology and Biostatistics                            | Stockholm     |               | SE |
| TwinGene       | Nancy L Pedersen      | Karolinska Institutet                                                            | Department of Medical Epidemiology and Biostatistics                            | Stockholm     |               | SE |
| TwinGene       | Alexander Viktorin    | Karolinska Institutet                                                            | The Department of Medical Epidemiology and Biostatistics                        | Stockholm     | Stockholm     | SE |
| TwinGene       | Erik Pettersson       | Karolinska Institutet                                                            | Biostatistics                                                                   | Stockholm     |               | SE |
| DK Control     | Thomas Werge          | The Lundbeck Foundation Initiative for Psychiatric Research                      | iPSYCH                                                                          | Copenhagen    |               | DK |
| DK Control     | Thomas Werge          | University of Copenhagen                                                         | Institute of Clinical Medicine                                                  | Copenhagen    |               | DK |
| DK Control     | Thomas Werge          | Mental Health Services Capital Region of Denmark                                 | Institute of Biological Psychiatry, Mental Health Center Sct. Hans              | Copenhagen    |               | DK |
| DK Control     | Thomas Hansen         | Mental Health Services Capital Region of Denmark                                 | Institute of Biological Psychiatry, Mental Health Center Sct. Hans              | Copenhagen    |               | DK |
| DK Control     | Thomas Hansen         | The Lundbeck Foundation Initiative for Psychiatric Research                      | iPSYCH                                                                          | Copenhagen    |               | DK |

# Han Pouget et al

|                      |                    |                                                        |                                              |             |    |    |
|----------------------|--------------------|--------------------------------------------------------|----------------------------------------------|-------------|----|----|
| Pfizer               | Sara A Paciga      | Pfizer Global Research and Development                 | Human Genetics and Computational Biomedicine | Groton      | CT | US |
| Pfizer               | Hualin S Xi        | Pfizer Global Research and Development                 | Computational Sciences Center of Emphasis    | Cambridge   | MA | US |
| Pfizer               | Ashley R Winslow   | Pfizer Global Research and Development                 | Human Genetics and Computational Medicine    | Cambridge   | MA | US |
| GenRED, GenRED2, DGN | Douglas F Levinson | Stanford University                                    | Psychiatry & Behavioral Sciences             | Stanford    | CA | US |
| GenRED, GenRED2, DGN | Myrna M Weissman   | New York State Psychiatric Institute                   | Division of Epidemiology                     | New York    | NY | US |
| GenRED, GenRED2, DGN | Myrna M Weissman   | Columbia University College of Physicians and Surgeons | Psychiatry                                   | New York    | NY | US |
| GenRED, GenRED2, DGN | James B Potash     | University of Iowa                                     | Psychiatry                                   | Iowa City   | IA | US |
| GenRED, GenRED2, DGN | Jianxin Shi        | National Cancer Institute                              | Division of Cancer Epidemiology and Genetics | Bethesda    | MD | US |
| GenRED, GenRED2      | James A Knowles    | University of Southern California                      | Psychiatry & The Behavioral Sciences         | Los Angeles | CA | US |
